# Supplementary material for: Behavioral Correlates of Empirically-Derived Dietary Patterns among University Students
Source: PubMed Central journal article supplement (PMC6024866; doi:10.3390/nu10060716), 2018-06-03
Supplement: nutrients-10-00716-s001.pdf [file nutrients-10-00716-s001.pdf]

**Supplementary Table S1. Bivariate associations between behavioral factors and dietary pattern scores (n=630)**

| Individual Predictors                 | Prudent Dietary Pattern |             |          |
|---------------------------------------|-------------------------|-------------|----------|
|                                       | $\beta$                 | F statistic | p-value  |
| Ate at dining hall                    |                         | 0.9         | 0.4216   |
| <i>Never</i>                          | 1.04                    |             |          |
| <i>Rarely</i>                         | -0.71                   |             |          |
| <i>Sometimes</i>                      | -0.30                   |             |          |
| <i>Frequently</i>                     | 0.00                    |             |          |
| Self-prepared meals                   |                         | 0.3         | 0.8625   |
| <i>Never</i>                          | -0.04                   |             |          |
| <i>Rarely</i>                         | 0.03                    |             |          |
| <i>Sometimes</i>                      | 0.02                    |             |          |
| <i>Frequently</i>                     | 0.08                    |             |          |
| Eating out <sup>a</sup>               |                         | 6.7         | 0.0002*  |
| <i>Never</i>                          | 0.35                    |             |          |
| <i>Rarely</i>                         | 0.10                    |             |          |
| <i>Sometimes</i>                      | -0.17                   |             |          |
| <i>Frequently</i>                     | -0.44                   |             |          |
| Friends influence food choice         |                         | 0.6         | 0.5297   |
| <i>Strongly positive/Positive</i>     | -0.00                   |             |          |
| <i>Strongly negative/Negative</i>     | 0.07                    |             |          |
| <i>No effect</i>                      | -0.04                   |             |          |
| Family effects food choice            |                         | 0.8         | 0.4643   |
| <i>Strongly positive/Positive</i>     | 0.03                    |             |          |
| <i>Strongly negative/Negative</i>     | -0.05                   |             |          |
| <i>No effect</i>                      | -0.09                   |             |          |
| Living situation effects food choice  |                         | 1.4         | 0.2606   |
| <i>Strongly positive/Positive</i>     | 0.10                    |             |          |
| <i>Strongly negative/Negative</i>     | -0.05                   |             |          |
| <i>No effect</i>                      | -0.02                   |             |          |
| Food availability effects food choice |                         | 1.8         | 0.1630   |
| <i>Strongly positive/Positive</i>     | 0.11                    |             |          |
| <i>Strongly negative/Negative</i>     | -0.06                   |             |          |
| <i>No effect</i>                      | 0.00                    |             |          |
| Nutrition effects food choice         |                         | 16.4        | <0.0001* |
| <i>Strongly positive/Positive</i>     | 0.09                    |             |          |
| <i>Strongly negative/Negative</i>     | 0.31                    |             |          |

|                                      |       |      |         |
|--------------------------------------|-------|------|---------|
| <i>No effect</i>                     | -0.53 |      |         |
| Culture/religion effects food choice |       | 0.8  | 0.4315  |
| <i>Strongly positive/Positive</i>    | -0.02 |      |         |
| <i>Strongly negative/Negative</i>    | 0.21  |      |         |
| <i>No effect</i>                     | -0.02 |      |         |
| Cost effects food choice             |       | 0.1  | 0.9395  |
| <i>Strongly positive/Positive</i>    | -0.04 |      |         |
| <i>Strongly negative/Negative</i>    | 0.01  |      |         |
| <i>No effect</i>                     | -0.00 |      |         |
| Hours of TV watched <sup>b</sup>     |       | 3.0  | 0.0068* |
| <i>0 hours</i>                       | 0.18  |      |         |
| <i>&lt;1 hour</i>                    | 0.02  |      |         |
| <i>1 hour</i>                        | -0.14 |      |         |
| <i>2 hours</i>                       | -0.17 |      |         |
| <i>3 hours</i>                       | 0.40  |      |         |
| <i>4 hours</i>                       | -0.16 |      |         |
| <i>5 or more hours</i>               | -0.67 |      |         |
| Adequate sleep <sup>c</sup>          |       | 4.2  | 0.0419* |
| <i>Yes</i>                           | 0.09  |      |         |
| <i>No</i>                            | -0.08 |      |         |
| Tried to lose weight                 |       | 7.0  | 0.0083* |
| <i>Yes</i>                           | 0.09  |      |         |
| <i>No</i>                            | -0.12 |      |         |
| Tried to gain weight                 |       | 0.7  | 0.3884  |
| <i>Yes</i>                           | 0.09  |      |         |
| <i>No</i>                            | -0.02 |      |         |
| Perceived life control <sup>d</sup>  |       | 1.8  | 0.1657  |
| <i>Not in control at all</i>         | -0.25 |      |         |
| <i>Completely in control</i>         | 0.05  |      |         |
| <i>Neutral</i>                       | -0.09 |      |         |
| Physical activity (MET minutes)      | 0.00  | 10.3 | 0.0014* |
| Current smoker                       |       | 0.1  | 0.7272  |
| <i>Yes</i>                           | 0.08  |      |         |
| <i>No</i>                            | -0.01 |      |         |

---

| Individual Predictors                 | Western Dietary Pattern |             |          |
|---------------------------------------|-------------------------|-------------|----------|
|                                       | $\beta$                 | F statistic | p-value  |
| Ate at dining hall                    |                         | 1.6         | 0.1892   |
| <i>Never</i>                          | 0.29                    |             |          |
| <i>Rarely</i>                         | -0.50                   |             |          |
| <i>Sometimes</i>                      | -0.45                   |             |          |
| <i>Frequently</i>                     | -0.02                   |             |          |
| Self-prepared meals                   |                         | 1.7         | 0.1642   |
| <i>Never</i>                          | 0.01                    |             |          |
| <i>Rarely</i>                         | -0.04                   |             |          |
| <i>Sometimes</i>                      | -0.17                   |             |          |
| <i>Frequently</i>                     | -0.63                   |             |          |
| Eating out <sup>a</sup>               |                         | 8.5         | <0.0001* |
| <i>Never</i>                          | -0.42                   |             |          |
| <i>Rarely</i>                         | -0.10                   |             |          |
| <i>Sometimes</i>                      | 0.05                    |             |          |
| <i>Frequently</i>                     | 0.72                    |             |          |
| Friends influence food choice         |                         | 6.6         | 0.0015*  |
| <i>Strongly positive/Positive</i>     | -0.03                   |             |          |
| <i>Strongly negative/Negative</i>     | -0.28                   |             |          |
| <i>No effect</i>                      | 0.08                    |             |          |
| Family effects food choice            |                         | 7.7         | 0.0005*  |
| <i>Strongly positive/Positive</i>     | 0.02                    |             |          |
| <i>Strongly negative/Negative</i>     | -0.49                   |             |          |
| <i>No effect</i>                      | 0.01                    |             |          |
| Living situation effects food choice  |                         | 0.4         | 0.6682   |
| <i>Strongly positive/Positive</i>     | -0.03                   |             |          |
| <i>Strongly negative/Negative</i>     | -0.01                   |             |          |
| <i>No effect</i>                      | -0.10                   |             |          |
| Food availability effects food choice |                         | 0.7         | 0.5076   |
| <i>Strongly positive/Positive</i>     | -0.04                   |             |          |
| <i>Strongly negative/Negative</i>     | -0.01                   |             |          |
| <i>No effect</i>                      | -0.16                   |             |          |
| Culture/religion effects food choice  |                         | 1.9         | 0.1517   |
| <i>Strongly positive/Positive</i>     | 0.03                    |             |          |
| <i>Strongly negative/Negative</i>     | -0.34                   |             |          |
| <i>No effect</i>                      | -0.02                   |             |          |

|                                     |       |      |          |
|-------------------------------------|-------|------|----------|
| Nutrition effects food choice       |       | 7.6  | 0.0005*  |
| <i>Strongly positive/Positive</i>   | -0.09 |      |          |
| <i>Strongly negative/Negative</i>   | 0.59  |      |          |
| <i>No effect</i>                    | 0.28  |      |          |
| Cost effects food choice            |       | 0.5  | 0.5804   |
| <i>Strongly positive/Positive</i>   | 0.02  |      |          |
| <i>Strongly negative/Negative</i>   | 0.01  |      |          |
| <i>No effect</i>                    | -0.07 |      |          |
| Hours of TV watched <sup>b</sup>    |       | 3.8  | 0.0011*  |
| <i>0 hours</i>                      | -0.21 |      |          |
| <i>&lt;1 hour</i>                   | -0.02 |      |          |
| <i>1 hour</i>                       | -0.05 |      |          |
| <i>2 hours</i>                      | 0.34  |      |          |
| <i>3 hours</i>                      | 0.39  |      |          |
| <i>4 hours</i>                      | 0.27  |      |          |
| <i>5 or more hours</i>              | -0.04 |      |          |
| Adequate sleep <sup>c</sup>         |       | 0.1  | 0.8168   |
| <i>Yes</i>                          | -0.02 |      |          |
| <i>No</i>                           | -0.04 |      |          |
| Tried to lose weight                |       | 42.9 | <0.0001* |
| <i>Yes</i>                          | -0.26 |      |          |
| <i>No</i>                           | 0.23  |      |          |
| Tried to gain weight                |       | 26.6 | <0.0001* |
| <i>Yes</i>                          | 0.50  |      |          |
| <i>No</i>                           | -0.10 |      |          |
| Perceived life control <sup>d</sup> |       | 1.7  | 0.1938   |
| <i>Not in control at all</i>        | -0.53 |      |          |
| <i>Completely in control</i>        | 0.00  |      |          |
| <i>Neutral</i>                      | -0.07 |      |          |
| Physical activity (MET minutes)     | 0.00  | 0.5  | 0.4978   |
| Current smoker                      |       | 0.0  | 0.9492   |
| <i>Yes</i>                          | -0.05 |      |          |
| <i>No</i>                           | -0.03 |      |          |

---

| Individual Predictors | Alcohol Dietary Pattern |             |         |
|-----------------------|-------------------------|-------------|---------|
|                       | $\beta$                 | F statistic | p-value |
| Ate at dining hall    |                         | 0.2         | 0.9951  |

|                                       |       |     |         |
|---------------------------------------|-------|-----|---------|
| <i>Never</i>                          | -0.16 |     |         |
| <i>Rarely</i>                         | -0.15 |     |         |
| <i>Sometimes</i>                      | 0.04  |     |         |
| <i>Frequently</i>                     | 0.03  |     |         |
| Self-prepared meals                   |       | 0.7 | 0.5745  |
| <i>Never</i>                          | 0.03  |     |         |
| <i>Rarely</i>                         | 0.01  |     |         |
| <i>Sometimes</i>                      | 0.17  |     |         |
| <i>Frequently</i>                     | 0.24  |     |         |
| Eating out <sup>a</sup>               |       | 4.9 | 0.0022* |
| <i>Never</i>                          | -0.37 |     |         |
| <i>Rarely</i>                         | -0.04 |     |         |
| <i>Sometimes</i>                      | 0.16  |     |         |
| <i>Frequently</i>                     | 0.37  |     |         |
| Friends influence food choice         |       | 4.1 | 0.0168* |
| <i>Strongly positive/Positive</i>     | 0.09  |     |         |
| <i>Strongly negative/Negative</i>     | 0.20  |     |         |
| <i>No effect</i>                      | -0.08 |     |         |
| Family effects food choice            |       | 1.4 | 0.2585  |
| <i>Strongly positive/Positive</i>     | 0.08  |     |         |
| <i>Strongly negative/Negative</i>     | -0.09 |     |         |
| <i>No effect</i>                      | -0.05 |     |         |
| Living situation effects food choice  |       | 1.0 | 0.3378  |
| <i>Strongly positive/Positive</i>     | -0.04 |     |         |
| <i>Strongly negative/Negative</i>     | 0.05  |     |         |
| <i>No effect</i>                      | 0.12  |     |         |
| Food availability effects food choice |       | 0.9 | 0.3980  |
| <i>Strongly positive/Positive</i>     | 0.03  |     |         |
| <i>Strongly negative/Negative</i>     | 0.01  |     |         |
| <i>No effect</i>                      | 0.19  |     |         |
| Culture/religion effects food choice  |       | 0.7 | 0.5195  |
| <i>Strongly positive/Positive</i>     | -0.07 |     |         |
| <i>Strongly negative/Negative</i>     | -0.06 |     |         |
| <i>No effect</i>                      | 0.05  |     |         |
| Nutrition effects food choice         |       | 0.1 | 0.9168  |
| <i>Strongly positive/Positive</i>     | 0.04  |     |         |
| <i>Strongly negative/Negative</i>     | -0.08 |     |         |
| <i>No effect</i>                      | 0.00  |     |         |

|                                     |       |      |         |
|-------------------------------------|-------|------|---------|
| Cost effects food choice            |       | 0.2  | 0.8299  |
| <i>Strongly positive/Positive</i>   | -0.01 |      |         |
| <i>Strongly negative/Negative</i>   | 0.06  |      |         |
| <i>No effect</i>                    | 0.03  |      |         |
| Hours of TV watched <sup>b</sup>    |       | 0.9  | 0.4839  |
| <i>0 hours</i>                      | -0.04 |      |         |
| <i>&lt;1 hour</i>                   | 0.08  |      |         |
| <i>1 hour</i>                       | 0.03  |      |         |
| <i>2 hours</i>                      | 0.08  |      |         |
| <i>3 hours</i>                      | 0.20  |      |         |
| <i>4 hours</i>                      | -0.69 |      |         |
| <i>5 or more hours</i>              | 0.33  |      |         |
| Adequate sleep <sup>c</sup>         |       | 1.4  | 0.2383  |
| <i>Yes</i>                          | -0.02 |      |         |
| <i>No</i>                           | 0.07  |      |         |
| Tried to lose weight                |       | 11.0 | 0.0010* |
| <i>Yes</i>                          | 0.15  |      |         |
| <i>No</i>                           | -0.10 |      |         |
| Tried to gain weight                |       | 7.8  | 0.0054* |
| <i>Yes</i>                          | 0.33  |      |         |
| <i>No</i>                           | -0.01 |      |         |
| Perceived life control <sup>d</sup> |       | 0.9  | 0.4212  |
| <i>Not in control at all</i>        | -0.03 |      |         |
| <i>Completely in control</i>        | -0.00 |      |         |
| <i>Neutral</i>                      | 0.11  |      |         |
| Physical activity (MET minutes)     | 0.00  | 1.6  | 0.2068  |
| Current smoker                      |       | 15.2 | 0.0001* |
| <i>Yes</i>                          | 0.97  |      |         |
| <i>No</i>                           | 0.01  |      |         |

<sup>a</sup> Participants could indicate how they obtained most of their meals in the past academic year: in the dining hall; prepared in their dorm, apartment, or home; or out at restaurants (never, rarely, sometimes, often).

<sup>b</sup> Participants could indicate whether they watched: 0 hours, less than 1 hour, 2 hours, 3 hours, 4 hours, or 5 or more hours of television per day.

<sup>c</sup> Adequate sleep was defined by the participant indicating that they agree or strongly agree that they usually sleep between 7 and 8 hours a night.

<sup>d</sup> Participants indicated on a scale of 1-10 their sense of control over their own life: 1 being not in control at all and 10 being in complete control. These responses were further categorized as such: not in control at all (respondent indicated 1-3 on the scale), in complete control (respondent indicated 8-10 on the scale), neutral (respondent indicated 4-7 on the scale).

**Supplementary Table S2. Differences in associations between behavioral factors and dietary pattern scores by gender (n=630)**

| Predictors                                | Prudent Dietary Pattern |           |          | Western Dietary Pattern |           |          | Alcohol Dietary Pattern |           |          |
|-------------------------------------------|-------------------------|-----------|----------|-------------------------|-----------|----------|-------------------------|-----------|----------|
|                                           | $\beta$                 | <i>se</i> | <i>p</i> | $\beta$                 | <i>se</i> | <i>p</i> | $\beta$                 | <i>se</i> | <i>p</i> |
| Eating out                                |                         |           |          |                         |           |          |                         |           |          |
| <i>Never* Female</i>                      | -0.98                   | 0.58      | 0.090    | 0.01                    | 0.51      | 0.982    | -0.22                   | 0.57      | 0.701    |
| <i>Never* Male</i>                        | —                       | —         | —        | —                       | —         | —        | —                       | —         | —        |
| <i>Rarely* Female</i>                     | -0.40                   | 0.42      | 0.344    | -0.22                   | 0.37      | 0.562    | -0.77                   | 0.42      | 0.067    |
| <i>Rarely* Male</i>                       | —                       | —         | —        | —                       | —         | —        | —                       | —         | —        |
| <i>Sometimes* Female</i>                  | -0.23                   | 0.43      | 0.583    | 0.08                    | 0.38      | 0.842    | -0.54                   | 0.42      | 0.205    |
| <i>Sometimes* Male</i>                    | —                       | —         | —        | —                       | —         | —        | —                       | —         | —        |
| <i>Frequently* Female</i>                 | —                       | —         | —        | —                       | —         | —        | —                       | —         | —        |
| <i>Frequently* Male</i>                   | —                       | —         | —        | —                       | —         | —        | —                       | —         | —        |
| Friends effect food choice                |                         |           |          |                         |           |          |                         |           |          |
| <i>Strongly positive/Positive* Female</i> | -0.15                   | 0.21      | 0.472    | -0.02                   | 0.18      | 0.913    | 0.02                    | 0.21      | 0.922    |
| <i>Strongly positive/Positive* Male</i>   | —                       | —         | —        | —                       | —         | —        | —                       | —         | —        |
| <i>Strongly negative/Negative* Female</i> | 0.15                    | 0.26      | 0.569    | 0.43                    | 0.23      | 0.064    | -0.16                   | 0.26      | 0.542    |
| <i>Strongly negative/Negative* Male</i>   | —                       | —         | —        | —                       | —         | —        | —                       | —         | —        |
| <i>No effect* Female</i>                  | —                       | —         | —        | —                       | —         | —        | —                       | —         | —        |
| <i>No effect* Male</i>                    | —                       | —         | —        | —                       | —         | —        | —                       | —         | —        |
| Family effects food choice                |                         |           |          |                         |           |          |                         |           |          |
| <i>Strongly positive/Positive* Female</i> | 0.10                    | 0.22      | 0.646    | -0.20                   | 0.19      | 0.291    | 0.05                    | 0.21      | 0.820    |
| <i>Strongly positive/Positive* Male</i>   | —                       | —         | —        | —                       | —         | —        | —                       | —         | —        |
| <i>Strongly negative/Negative* Female</i> | -0.01                   | 0.39      | 0.976    | 0.19                    | 0.35      | 0.587    | 0.24                    | 0.39      | 0.535    |
| <i>Strongly negative/Negative* Male</i>   | —                       | —         | —        | —                       | —         | —        | —                       | —         | —        |
| <i>No effect* Female</i>                  | —                       | —         | —        | —                       | —         | —        | —                       | —         | —        |
| <i>No effect* Male</i>                    | —                       | —         | —        | —                       | —         | —        | —                       | —         | —        |
| Nutrition effects food choice             |                         |           |          |                         |           |          |                         |           |          |
| <i>Strongly positive/Positive* Female</i> | 0.08                    | 0.23      | 0.725    | -0.05                   | 0.20      | 0.791    | -0.27                   | 0.23      | 0.228    |
| <i>Strongly positive/Positive* Male</i>   | —                       | —         | —        | —                       | —         | —        | —                       | —         | —        |
| <i>Strongly negative/Negative* Female</i> | -0.28                   | 0.89      | 0.754    | 0.69                    | 0.79      | 0.379    | -0.44                   | 0.88      | 0.614    |
| <i>Strongly negative/Negative* Male</i>   | —                       | —         | —        | —                       | —         | —        | —                       | —         | —        |
| <i>No effect* Female</i>                  | —                       | —         | —        | —                       | —         | —        | —                       | —         | —        |
| <i>No effect* Male</i>                    | —                       | —         | —        | —                       | —         | —        | —                       | —         | —        |
| Hours per day of TV                       |                         |           |          |                         |           |          |                         |           |          |
| <i>0 hours* Female</i>                    | -0.64                   | 1.12      | 0.566    | -0.49                   | 0.99      | 0.624    | 1.71                    | 1.11      | 0.124    |

|                               |       |      |       |        |      |       |       |      |       |
|-------------------------------|-------|------|-------|--------|------|-------|-------|------|-------|
| <i>0 hours*Male</i>           | —     | —    | —     | —      | —    | —     | —     | —    | —     |
| <i>&lt;1 hour*Female</i>      | -0.39 | 1.11 | 0.725 | -0.39  | 0.99 | 0.696 | 1.5   | 1.1  | 0.17  |
| <i>&lt;1 hour*Male</i>        | —     | —    | —     | —      | —    | —     | —     | —    | —     |
| <i>1 hour*Female</i>          | -0.70 | 1.11 | 0.532 | -0.696 | 0.99 | 0.484 | 1.50  | 1.10 | 0.175 |
| Hours per day of TV (cont.)   |       |      |       |        |      |       |       |      |       |
| <i>1 hour*Male</i>            | —     | —    | —     | —      | —    | —     | —     | —    | —     |
| <i>2 hours*Female</i>         | -0.28 | 1.13 | 0.806 | -0.85  | 1.01 | 0.400 | 1.70  | 1.13 | 0.131 |
| <i>2 hours*Male</i>           | —     | —    | —     | —      | —    | —     | —     | —    | —     |
| <i>3 hours*Female</i>         | -0.46 | 1.16 | 0.695 | -1.14  | 1.03 | 0.271 | 0.72  | 1.15 | 0.533 |
| <i>3 hours*Male</i>           | —     | —    | —     | —      | —    | —     | —     | —    | —     |
| <i>4 hours*Female</i>         | —     | —    | —     | —      | —    | —     | —     | —    | —     |
| <i>4 hours*Male</i>           | —     | —    | —     | —      | —    | —     | —     | —    | —     |
| <i>5 or more hours*Female</i> | —     | —    | —     | —      | —    | —     | —     | —    | —     |
| <i>5 or more hours*Male</i>   | —     | —    | —     | —      | —    | —     | —     | —    | —     |
| Tried to lose weight          |       |      |       |        |      |       |       |      |       |
| <i>Yes*Female</i>             | 0.17  | 0.18 | 0.359 | 0.17   | 0.16 | 0.285 | 0.01  | 0.18 | 0.935 |
| <i>Yes*Male</i>               | —     | —    | —     | —      | —    | —     | —     | —    | —     |
| <i>No*Female</i>              | —     | —    | —     | —      | —    | —     | —     | —    | —     |
| <i>No*Male</i>                | —     | —    | —     | —      | —    | —     | —     | —    | —     |
| Tried to gain weight          |       |      |       |        |      |       |       |      |       |
| <i>Yes*Female</i>             | -0.50 | 0.28 | 0.083 | 0.20   | 0.25 | 0.427 | -0.48 | 0.28 | 0.091 |
| <i>Yes*Male</i>               | —     | —    | —     | —      | —    | —     | —     | —    | —     |
| <i>No*Female</i>              | —     | —    | —     | —      | —    | —     | —     | —    | —     |
| <i>No*Male</i>                | —     | —    | —     | —      | —    | —     | —     | —    | —     |
| Physical Activity (MET        |       |      |       |        |      |       |       |      |       |
| minutes)*Female               | 0.00  | 0.00 | 0.424 | 0.00   | 0.00 | 0.665 | 0.00  | 0.00 | 0.505 |
| Physical Activity (MET        |       |      |       |        |      |       |       |      |       |
| minutes)*Male                 | —     | —    | —     | —      | —    | —     | —     | —    | —     |
| Current smoker                |       |      |       |        |      |       |       |      |       |
| <i>Yes*Female</i>             | 0.51  | 0.53 | 0.336 | -0.33  | 0.47 | 0.479 | 0.28  | 0.52 | 0.598 |
| <i>Yes*Male</i>               | —     | —    | —     | —      | —    | —     | —     | —    | —     |
| <i>No*Female</i>              | —     | —    | —     | —      | —    | —     | —     | —    | —     |
| <i>No*Male</i>                | —     | —    | —     | —      | —    | —     | —     | —    | —     |

Models were run with the following predictors included: frequency of eating out, perceived influence of friends on food choice, perceived influence of family on food choice, perceived influence of nutrition on food choice, reported hours of television watched per day, attempt to gain weight in the last year, attempt to lose weight in the last year, metabolic equivalent of task (MET) minutes of physical activity, and current smoking status. Interactions between each of the aforementioned behaviors and gender were also tested (shown above). All results are adjusted for age and race.

None of the overall F-tests were significant at  $p < 0.05$ .

— reference category for all categorical variables



**Supplementary Table S3. Differences in associations between behavioral factors and dietary pattern scores by race/ethnicity (n=630)**

| Predictors                                                     | Prudent Dietary Pattern |           |          | Western Dietary Pattern |           |          | Alcohol Dietary Pattern |           |          |
|----------------------------------------------------------------|-------------------------|-----------|----------|-------------------------|-----------|----------|-------------------------|-----------|----------|
|                                                                | $\beta$                 | <i>se</i> | <i>p</i> | $\beta$                 | <i>se</i> | <i>p</i> | $\beta$                 | <i>se</i> | <i>p</i> |
| Eating out                                                     |                         |           |          |                         |           |          |                         |           |          |
| <i>Never* Non-Hispanic White</i>                               | 0.49                    | 0.60      | 0.410    | 0.24                    | 0.53      | 0.653    | 0.19                    | 0.59      | 0.743    |
| <i>Never*Male</i>                                              | —                       | —         | —        | —                       | —         | —        | —                       | —         | —        |
| <i>Rarely*Non-Hispanic White</i>                               | 0.13                    | 0.43      | 0.762    | 0.52                    | 0.38      | 0.174    | 0.08                    | 0.42      | 0.856    |
| <i>Rarely* All Other Races/Ethnicities</i>                     | —                       | —         | —        | —                       | —         | —        | —                       | —         | —        |
| <i>Sometimes* Non-Hispanic White</i>                           | -0.09                   | 0.43      | 0.844    | 0.31                    | 0.39      | 0.419    | 0.27                    | 0.43      | 0.535    |
| <i>Sometimes* All Other Races/Ethnicities</i>                  | —                       | —         | —        | —                       | —         | —        | —                       | —         | —        |
| <i>Frequently* Non-Hispanic White</i>                          | —                       | —         | —        | —                       | —         | —        | —                       | —         | —        |
| <i>Frequently*All Other Races/Ethnicities</i>                  | —                       | —         | —        | —                       | —         | —        | —                       | —         | —        |
| Friends effect food choice                                     |                         |           |          |                         |           |          |                         |           |          |
| <i>Strongly positive/Positive*Non-Hispanic White</i>           | -0.03                   | 0.22      | 0.901    | -0.35                   | 0.20      | 0.076    | -0.16                   | 0.22      | 0.460    |
| <i>Strongly positive/Positive*All Other Races/Ethnicities</i>  | —                       | —         | —        | —                       | —         | —        | —                       | —         | —        |
| <i>Strongly negative/Negative*Non-Hispanic White</i>           | -0.06                   | 0.28      | 0.842    | -0.17                   | 0.25      | 0.483    | -0.15                   | 0.27      | 0.590    |
| <i>Strongly negative/Negative*All Other Races/Ethnicities</i>  | —                       | —         | —        | —                       | —         | —        | —                       | —         | —        |
| <i>No effect* Non-Hispanic White</i>                           | —                       | —         | —        | —                       | —         | —        | —                       | —         | —        |
| <i>No effect* All Other Races/Ethnicities</i>                  | —                       | —         | —        | —                       | —         | —        | —                       | —         | —        |
| Family effects food choice                                     |                         |           |          |                         |           |          |                         |           |          |
| <i>Strongly positive/Positive*Non-Hispanic White</i>           | 0.16                    | 0.24      | 0.504    | -0.13                   | 0.22      | 0.554    | -0.10                   | 0.24      | 0.680    |
| <i>Strongly positive/Positive*All Other Races/Ethnicities</i>  | —                       | —         | —        | —                       | —         | —        | —                       | —         | —        |
| <i>Strongly negative/Negative* Non-Hispanic White</i>          | 0.58                    | 0.37      | 0.114    | 0.12                    | 0.33      | 0.724    | 0.21                    | 0.36      | 0.559    |
| <i>Strongly negative/Negative* All Other Races/Ethnicities</i> | —                       | —         | —        | —                       | —         | —        | —                       | —         | —        |
| <i>No effect* Non-Hispanic White</i>                           | —                       | —         | —        | —                       | —         | —        | —                       | —         | —        |
| <i>No effect* All Other Races/Ethnicities</i>                  | —                       | —         | —        | —                       | —         | —        | —                       | —         | —        |
| Nutrition effects food choice                                  |                         |           |          |                         |           |          |                         |           |          |

|                                                               |       |      |       |       |      |       |       |      |                    |
|---------------------------------------------------------------|-------|------|-------|-------|------|-------|-------|------|--------------------|
| <i>Strongly positive/Positive*Non-Hispanic White</i>          | -0.46 | 0.25 | 0.067 | -0.04 | 0.22 | 0.843 | 0.35  | 0.25 | 0.159              |
| <i>Strongly positive/Positive*All Other Races/Ethnicities</i> | —     | —    | —     | —     | —    | —     | —     | —    | —                  |
| Nutrition effects food choice (cont.)                         |       |      |       |       |      |       |       |      |                    |
| <i>Strongly negative/Negative*Non-Hispanic White</i>          | 0.77  | 0.88 | 0.379 | -0.98 | 0.78 | 0.210 | -0.38 | 0.86 | 0.659              |
| <i>Strongly negative/Negative*All Other Races/Ethnicities</i> | —     | —    | —     | —     | —    | —     | —     | —    | —                  |
| <i>No effect* Non-Hispanic White</i>                          | —     | —    | —     | —     | —    | —     | —     | —    | —                  |
| <i>No effect* All Other Races/Ethnicities</i>                 | —     | —    | —     | —     | —    | —     | —     | —    | —                  |
| Hours per day of TV                                           |       |      |       |       |      |       |       |      |                    |
| <i>0 hours*Non-Hispanic White</i>                             | 0.41  | 0.93 | 0.661 | 0.96  | 0.83 | 0.248 | -0.26 | 0.91 | 0.776 <sup>+</sup> |
| <i>0 hours*All Other Races/Ethnicities</i>                    | —     | —    | —     | —     | —    | —     | —     | —    | —                  |
| <i>&lt;1 hour*Non-Hispanic White</i>                          | 0.19  | 0.93 | 0.835 | 1.13  | 0.83 | 0.171 | 0.30  | 0.91 | 0.738 <sup>+</sup> |
| <i>&lt;1 hour*All Other Races/Ethnicities</i>                 | —     | —    | —     | —     | —    | —     | —     | —    | —                  |
| <i>1 hour*Non-Hispanic White</i>                              | 0.32  | 0.93 | 0.727 | 1.23  | 0.83 | 0.147 | 0.58  | 0.91 | 0.527 <sup>+</sup> |
| <i>1 hour*All Other Races/Ethnicities</i>                     | —     | —    | —     | —     | —    | —     | —     | —    | —                  |
| <i>2 hours*Non-Hispanic White</i>                             | 0.38  | 0.95 | 0.687 | 0.97  | 0.85 | 0.256 | 0.32  | 0.94 | 0.735 <sup>+</sup> |
| <i>2 hours*All Other Races/Ethnicities</i>                    | —     | —    | —     | —     | —    | —     | —     | —    | —                  |
| <i>3 hours*Non-Hispanic White</i>                             | -0.03 | 1.05 | 0.979 | 0.61  | 0.94 | 0.517 | -0.74 | 1.04 | 0.477 <sup>+</sup> |
| <i>3 hours*All Other Races/Ethnicities</i>                    | —     | —    | —     | —     | —    | —     | —     | —    | —                  |
| <i>4 hours*Non-Hispanic White</i>                             | 0.65  | 1.29 | 0.618 | 1.90  | 1.15 | 0.100 | -0.08 | 1.27 | 0.949 <sup>+</sup> |
| <i>4 hours*All Other Races/Ethnicities</i>                    | —     | —    | —     | —     | —    | —     | —     | —    | —                  |
| <i>5 or more hours*Non-Hispanic White</i>                     | —     | —    | —     | —     | —    | —     | —     | —    | —                  |
| <i>5 or more hours*All Other Races/Ethnicities</i>            | —     | —    | —     | —     | —    | —     | —     | —    | —                  |
| Tried to lose weight                                          |       |      |       |       |      |       |       |      |                    |
| <i>Yes*Non-Hispanic White</i>                                 | 0.07  | 0.20 | 0.729 | -0.01 | 0.18 | 0.977 | 0.32  | 0.20 | 0.105              |
| <i>Yes*All Other Races/Ethnicities</i>                        | —     | —    | —     | —     | —    | —     | —     | —    | —                  |
| <i>No*Non-Hispanic White</i>                                  | —     | —    | —     | —     | —    | —     | —     | —    | —                  |
| <i>No*All Other Races/Ethnicities</i>                         | —     | —    | —     | —     | —    | —     | —     | —    | —                  |
| Tried to gain weight                                          |       |      |       |       |      |       |       |      |                    |
| <i>Yes*Non-Hispanic White</i>                                 | 0.13  | 0.28 | 0.653 | -0.08 | 0.25 | 0.758 | -0.10 | 0.28 | 0.713              |
| <i>Yes*All Other Races/Ethnicities</i>                        | —     | —    | —     | —     | —    | —     | —     | —    | —                  |
| <i>No*Non-Hispanic White</i>                                  | —     | —    | —     | —     | —    | —     | —     | —    | —                  |
| <i>No*All Other Races/Ethnicities</i>                         | —     | —    | —     | —     | —    | —     | —     | —    | —                  |
| Physical Activity (MET minutes)*Non-Hispanic White            |       |      |       |       |      |       |       |      |                    |
|                                                               | -0.00 | 0.00 | 0.686 | 0.00  | 0.00 | 0.249 | -0.00 | 0.00 | 0.322              |

|                                                             |       |      |       |      |      |       |       |       |       |
|-------------------------------------------------------------|-------|------|-------|------|------|-------|-------|-------|-------|
| Physical Activity (MET minutes)*All Other Races/Ethnicities | —     | —    | —     | —    | —    | —     | —     | —     | —     |
| Current smoker                                              |       |      |       |      |      |       |       |       |       |
| <i>Yes*Non-Hispanic White</i>                               | -0.55 | 0.78 | 0.477 | 1.12 | 0.69 | 0.107 | -1.50 | 0.768 | 0.052 |
| <i>Yes*All Other Races/Ethnicities</i>                      | —     | —    | —     | —    | —    | —     | —     | —     | —     |
| <i>No*Non-Hispanic White</i>                                | —     | —    | —     | —    | —    | —     | —     | —     | —     |
| <i>No*All Other Races/Ethnicities</i>                       | —     | —    | —     | —    | —    | —     | —     | —     | —     |

Models were run with the following predictors included: frequency of eating out, perceived influence of friends on food choice, perceived influence of family on food choice, perceived influence of nutrition on food choice, reported hours of television watched per day, attempt to gain weight in the last year, attempt to lose weight in the last year, metabolic equivalent of task (MET) minutes of physical activity, and current smoking status. Interactions between each of the aforementioned behaviors and race/ethnicity were also tested (shown above). All results are adjusted for age and gender.

<sup>†</sup>overall F-test  $p < 0.05$  for the model evaluating associations between total hours of television watched per day and adherence to the alcohol pattern by race/ethnicity.

— reference category for all categorical variables
